# Supplementary material for: Clustered regularly interspaced short palindromic repeats/CRISPR-associated protein 9-generated diallelic mutants reveal Arabidopsis actin-related protein 2 function in the trafficking of syntaxin PEN1
Source: Front Plant Sci. 2022 Sep 20;13:934002. doi: 10.3389/fpls.2022.934002 (PMC9531028; doi:10.3389/fpls.2022.934002)
Supplement: Supplementary file 1 [file Table_1.XLSX]

## Sheet: Table S1
Supplemental Table 1. Primers used in this study.
		Orientation	Purpose	Sequence(5' ot 3')
	DG495	forward primer	CRISPR PCR reaction 1 gRNA1	TCGTCTCCTGGGAAGGCCATCTGCCTATACGGCAGTGAAC
	DG496	reverse primer	CRISPR PCR reaction 1 gRNA1	TCGTCTCACCCACGACACAGGTTTTAGAGCTAGAAATAGC
	DG497	forward primer	CRISPR PCR reaction 2 gRNA2	TCGTCTCCAGCAAGTCTCCCCTGCCTATACGGCAGTGAAC
	DG498	reverse primer	CRISPR PCR reaction 2 gRNA2	TCGTCTCATGCTCTGAGCTCGTTTTAGAGCTAGAAATAGC
	DG499	forward primer	CRISPR PCR reaction 3 gRNA3	TCGTCTCCCGGCTACTCGTTCTGCCTATACGGCAGTGAAC
	DG500	reverse primer	CRISPR PCR reaction 3 gRNA3	TCGTCTCAGCCGTCAACCACGTTTTAGAGCTAGAAATAGC
	DG587	forward primer	Validation for CRISPR editing events	TCCATTCCTATCTGGGTTTCGTT
	DG588	reverse primer	Validation for CRISPR editing events	TTCCCTAACCGTCTCAAAGTCAG
	DG593	forward primer	Validation for the existence of transformed vector	CACGACGGGCGTTCCTTGC
	DG594	reverse primer	Validation for the existence of transformed vector	GGTGGTCGAATGGGCAGGTAGC
	DG684	forward primer	ddPCR for ARP2 gene	ACCATGTACCCAGGATTACC
	DG685	reverse primer	ddPCR for ARP2 gene	CGATCCGCAATCTGAGTTTC
	DG686	forward primer	ddPCR for ARP3 gene	AAATTACGTCTCAACCGGTGGA
	DG687	reverse primer	ddPCR for ARP3 gene	CAACTCGCGAAAAACTCAGGAG
	GP473	forward primer	ddPCR for Actin2 gene	GGTAACATTGTGCTCAGTGGTGG
	GP474	reverse primer	ddPCR for Actin2 gene	AACGACCTTAATCTTCATGCTGC
	DG614	forward primer	Off-target validation, targeting AT5G08370	CGGCTGCGATCTTAGATCGA
	DG615	reverse primer	Off-target validation, targeting AT5G08370	ACATTTTGCAGGCATGAGGC
